# Supplementary material for: Associations between urine glyphosate levels and metabolic health risks: insights from a large cross-sectional population-based study
Source: Research Square preprint supplement (doi:10.21203/rs.3.rs-4272811/v1), 2024-04-24
Supplement: Supplementary file 1 [file 67ebee0cc756ecfaddbbb40c.docx]

Otaru et al. 2024

“Urine glyphosate measurements are associated with elevated metabolic syndrome scores in a general population: NHANES 2013-2018”

**Supplemental Information**

**Supplemental Figure 1**. Correlogram showing correlations between features used in EFA procedure to create a single score for metabolic syndrome. Ellipses become narrower and darker for higher correlations. Here correlations range from 0.1 to 0.46.

**Figure 2A**. Log-transformed exposure levels by race**.** Width of each box indicates the relative number of participants per race.

**Figure 2B.** Log-transformed exposure levels by age category.

**Supplemental Table 1.**

Baseline characteristics of study population with missing units summarized.

NHANES cycles 2013 – 2014, 2015-2016, 2017-2018.

| **Covariate** | **Level** | **Male**  (n = 10797) | **Female**  **(**n = 11461) | **Missing** (%) |
| --- | --- | --- | --- | --- |
| Sex | Male | 10797 (100.0) | - | - |
| Female | - | 11461 (100.0) |
| Age Category  Ref < 19 years | <19yrs | 2590 ( 24.0) | 2611 ( 22.8) | - |
| 20-39yrs | 2687 ( 24.9) | 2907 ( 25.4) |
| 40-59yrs | 2612 ( 24.2) | 2959 ( 25.8) |
| >60yrs | 2908 ( 26.9) | 2984 ( 26.0) |
| Race-Ethnicity  Ref:  NH White | White (ref) | 3834 ( 35.5) | 3877 ( 33.8) |  |
| Mexican American | 1711 ( 15.8) | 1894 ( 16.5) | - |
| Other Hispanic | 1049 ( 9.7) | 1274 ( 11.1) |
| Black | 2367 ( 21.9) | 2520 ( 22.0) |
| Asian | 1308 ( 12.1) | 1403 ( 12.2) |
| Multiracial | 528 ( 4.9) | 493 ( 4.3) |
| BMI Mean (SD) | | 27.5 (6.76) | 28.6 (8.04) | 1227 (5.5%) |
| Income-Poverty Ratio Med [IQR] | | 2.0 [1.1, 3.9] | 1.88 [1.0, 3.7] | 2380 (10.7) |
|  | |  |  |  |
| Urine Creatinine | | 1.31 [0.80 ,1.91] | 0.97 [0.53, 1.55] | 1493 (6.7) |
| Urine Glyphosate | | 0.36 [0.1, 0.65] | 0.32 [0.14, 0.57] | 16469 (74) |
| Urine ACR | |  |  |  |

**Supplemental Table 2**

Covariates used to create Metabolic Syndrome (MetS) score, summarized by quartile *prior to imputation* and EFA (N=22258). Variables and composite variables used in score are shown boldface. MAP = SBP + 1/3 (SBP - DBP).

| Feature | Min | 25% | 50% | 75% | Max | Missing (%) |
| --- | --- | --- | --- | --- | --- | --- |
| **Waist circumference** | 49.5 | 81.7 | 94.4 | 107 | 177.9 | 2156 (9.7%) |
| Systolic blood pressure | 64.67 | 108 | 117.33 | 130 | 231.33 | 3254 (14.6) |
| Diastolic blood pressure | 0 | 60 | 68 | 75.33 | 135.33 | 3254 (14.6) |
| **Glycoheme (HbA1c)** | 3.5 | 5.2 | 5.5 | 5.8 | 17.5 | 3244 (14.6) |
| **Fasting Glucose** | 21 | 94 | 100 | 110 | 479 | 13223 (59) |
| HDL | 6 | 42 | 51 | 62 | 226 | 2505 (11.3) |
| Triglycerides | 10 | 58 | 87 | 131 | 4233 | 13555 (61) |
| **Triglyceride : HDL Ratio** | 0.13 | 0.99 | 1.64 | 2.81 | 103.24 | 13555 (61) |
| **Mean Arterial Pressure (MAP)** | 71.56 | 122.67 | 134 | 149.33 | 279.56 | 3254 (14.6) |

**Supplemental Table 3**

MetS score validation statistics with performance in classifiying MetS-associated renal risk using a logistic model with micro and macroalbuminuria cut-offs as shown (N=20765). Note that not all MetS patients have micro or macroalbuminuria, but likelihood of comorbidity with MetS increases with ACS score (Shi et al. 2020). Diagnostic OR is the ratio of the odds of positivity in those with disease to the odds of positivity in those without (Glas et al. 2003). A value of 1 indicates that the test cannot discriminate, and higher values indicate better discriminatory performance.

| **ACR cutoff definition** | **error rate** | **Sensitivity** | **Specificity** | **Accuracy** | **Diagnostic OR** |
| --- | --- | --- | --- | --- | --- |
| Microalbuminuria ACR >30 mg/g | 12.3% | 0.873 | 0.769 | 0.873 | 1.99 |
| Microalbuminaria ACR >100mg/g | 5.0% | 0.945 | 1.00 | 0.973 | 17.18 |
| Macroalbuminuria ACR > 300 mg/g | 2.2% | 0.978 | 1.00 | 0.989 | 44.45 |

**Supplemental Table 4**

Associations between standardized metabolic score and glyphosate, categorized by quartile, adjusted models stratified by age category. Models are adjusted by standardized BMI, standardized creatinine, sex (reference Male), race-ethnicity ( reference Non-Hispanic White), and standardized income-poverty ratio. Since confidence intervals overlap, there is little evidence for effect modification by age, except perhaps for the oldest cohort, which has the strongest associations. Sample size overlap is due to much reduced sample sizes after stratification. Results are not adjusted for multiple comparisons.

| Age Category | **Glyphosate Level** | **Estimate** | **95% CI** | **p-value** |
| --- | --- | --- | --- | --- |
| 10 to 19 years  (n = 1156) | (Intercept) | -0.040 | -0.172, 0.091 | 0.55 |
| Quartile 2 | 0.095 | -0.037, 0.227 | 0.16 |
| Quartile 3 | 0.091 | -0.043, 0.225 | 0.18 |
| Quartile 4 | **0.176** | **0.035, 0.316** | **0.015** |
| 20 to 39 years  (n = 1324) | (Intercept) | -0.002 | -0.134, 0.131 | 0.98 |
| Quartile 2 | **0.211** | **0.070, 0.352** | **0.003** |
| Quartile 3 | **0.131** | **-0.016, 0.278** | ***0.080*** |
| Quartile 4 | **0.205** | **0.041, 0.369** | **0.014** |
| 40 to 59 years  (n = 1375) | (Intercept) | -0.088 | -0.213, 0.037 | 0.17 |
| Quartile 2 | 0.002 | -0.132, 0.136 | 0.97 |
| Quartile 3 | **0.232** | **0.090, 0.374** | **0.0014** |
| Quartile 4 | **0.154** | **-0.005, 0.312** | ***0.05*** |
| 60 years  and above  (n = 1369) | (Intercept) | -0.203 | -0.342, -0.063 | 0.0044 |
| Quartile 2 | **0.181** | **0.032, 0.329** | **0.017** |
| Quartile 3 | **0.319** | **0.165, 0.474** | **0.00005** |
| Quartile 4 | **0.278** | **0.120, 0.437** | **0.0006** |

**Supplemental Table 5**

Associations between standardized metabolic score and glyphosate, categorized by quartile, adjusted models stratified by race-ethnicity categories. Models are adjusted by standardized BMI, standardized creatinine, sex (reference Male), age category (reference 10 to 19 years) and standardized income-poverty ratio.

| **Race-Ethnicity** | **Level** | **Estimate** | **95% CI** | **p-value** |
| --- | --- | --- | --- | --- |
| White  (n = 1979) | (Intercept) | -0.434 | -0.545, -0.322 | <0.00001 |
| Quartile 2 | 0.046 | -0.05, 0.141 | 0.35 |
| Quartile 3 | 0.080 | -0.02, 0.181 | 0.12 |
| Quartile 4 | **0.108** | **0.00, 0.216** | **0.049** |
| Mexican American  (n = 833) | (Intercept) | -0.528 | -0.683, -0.373 | <0.00001 |
| Quartile 2 | **0.160** | **0.004, 0.315** | ***0.045*** |
| Quartile 3 | **0.233** | **0.077, 0.390** | **0.0035** |
| Quartile 4 | **0.227** | **0.043, 0.412** | **0.016** |
| Other Hispanic  (n = 523) | (Intercept) | -0.582 | -0.813 -0.350 | <0.00001 |
| Quartile 2 | 0.116 | -0.087, 0.319 | 0.26 |
| Quartile 3 | **0.263** | **0.046, 0.481** | **0.018** |
| Quartile 4 | **0.376** | **0.148, 0.603** | **0.0014** |
| Black  (n = 1071) | (Intercept) | -0.657 | -0.832, -0.482 | <0.00001 |
| Quartile 2 | **0.262** | **0.103, 0.421** | **0.0012** |
| Quartile 3 | **0.401** | **0.241, 0.561** | **<0.00001** |
| Quartile 4 | **0.264** | **0.099, 0.428** | **0.0017** |
| Asian  (n = 569) | (Intercept) | -0.364 | -0.564, -0.164 | 0.0004 |
| Quartile 2 | -0.073 | -0.247, 0.100 | 0.41 |
| Quartile 3 | -0.027 | -0.225, 0.171 | 0.79 |
| Quartile 4 | 0.037 | -0.174, 0.249 | 0.73 |
| Multiracial  (n = 249) | (Intercept) | -0.141 | -0.472, 0.190 | 0.40 |
| Quartile 2 | -0.267 | -0.611, 0.077 | 0.13 |
| Quartile 3 | 0.008 | -0.342, 0.358 | 0.96 |
| Quartile 4 | -0.050 | -0.415, 0.315 | 0.79 |

**Supplemental Table 6**

Associations between standardized metabolic score and glyphosate, categorized by quartile, adjusted models stratified by sex. While there are differences by sex, confidence intervals overlap, so there is little evidence of effect modification by sex. Models are adjusted by standardized BMI, standardized creatinine, sex (reference Male), age category (reference 10-19 years), race-ethnicity ( reference Non-Hispanic White), and standardized income-poverty ratio.

| **Sex** | **Level** | **Estimate** | **95% CI** | **p-value** |
| --- | --- | --- | --- | --- |
| Female  (n = 2619) | (Intercept) | -0.675 | -0.785, -0.564 | <0.00001 |
| Quartile 2 | 0.092 | 0.003, 0.182 | 0.043 |
| Quartile 3 | 0.193 | 0.098, 0.288 | 0.00074 |
| Quartile 4 | 0.157 | 0.052, 0.262 | 0.0033 |
| Male  (n = 2605) | (Intercept) | -0.77 | -0.873, -0.668 | <0.00001 |
| Quartile 2 | 0.097 | 0.007, 0.187 | *0.035* |
| Quartile 3 | 0.176 | 0.084, 0.267 | 0.00016 |
| Quartile 4 | 0.192 | 0.097, 0.288 | 0.00008 |
