# Supplementary material for: Associations between urine glyphosate levels and metabolic health risks: insights from a large cross-sectional population-based study
Source: Research Square preprint supplement (doi:10.21203/rs.3.rs-4272811/v1), 2024-04-24
Supplement: Supplementary file 2 [file 70bf57716f9d103815410df1.docx]

**Appendix 1. Common Definitions of Metabolic Syndrome**

| **Organization1** | **Obesity** | **High TG** | **Low HDL-C** | **Blood glucose** | **High blood pressure** | **Diagnostic criteria** |
| --- | --- | --- | --- | --- | --- | --- |
| WHO (1998) | Waist/hip ratio > 0.9 in men or > 0.85 in women or BMI > 30 kg/m2 | TG ≥150 mg/dL | HDLC < 40 mg/dl in men or HDL-C < 50 mg/dl in women | IGT, IFG, or T2D | ≥140/90 mmHg | IGT, IFG, T2D, or reduced insulin sensitivity plus any two of the criteria |
| EGIR (1999) | WC >37 inches in men or > 32 inches in women | TG ≥150 mg/dL | <39 mg/dL in men and women | IFG or IGT | ≥140 mmHg systolic and ≥ 90 mmHg diastolic or on treatment for HTN | Three or more criteria, including insulin resistance |
| NCEP ATPIII (2001) | WC ≥102 cm in men or ≥ 88 cm in women | TG ≥150 mg/dl or on therapy lowering TG | <40 mg/dL in men or < 50 mg/dL in women or therapy increasing HDL-C | ≥100 mg/dL (including T2D) | ≥130/85 mmHg or on treatment for HTN | Three or more criteria |
| AACE (2003) | BMI ≥25 kg/m2 | ≥150 mg/dL | <40 mg/dL in men or < 50 mg/dL in women | IGT or lFG | ≥130/85 mmHg | IGT or IFG plus any of the criteria |
| IDF (2005) | Population-specific increased WC cutoffs | ≥150 mg/dL or on TG lowering treatment | <40 mg/dL (men) or < 50 mg/dL (women) or on HDL treatment | IFG or on treatment for hyperglycemia or has T2D diagnosis | ≥130 mmHg systolic and/or ≥ 85 mmHg diastolic or on treatment for HTN | Three or more criteria, one of which should be central obesity |
| IDF (2009) | Population- and country-specific WC cutoffs | TG ≥150 mg/dL | <40 mg/dL in men or < 50 mg/dL in women | ≥100 mg/dL | ≥130/85 mmHg or on treatment for HTN | Three or more criteria |
| AHA/NHLBI (2009) | Central obesity | ≥150 mg/dL or treated with lipid lowering drug | <40 mg/dL in men or < 50 mg/dL in women or on treatment | IFG or on treated with diabetes drug or T2D diagnosis | ≥130 mmHg systolic and/or ≥ 85 mmHg diastolic or on treatment for HTN | Three or more criteria |
| WC > 40 inches in men or > 35 inches in women |
|  |

**1AACE**: American Association of Clinical Endocrinologists; **AHA/NHLBI**: American Heart Association/National Heart, Lung, and Blood
 Institute; **BMI**: Body Mass Index; **EGIR**: European Group for the Study of Insulin Resistance; **HDL-C**: High-Density Lipoprotein Choles
-terol; **HTN**: Hypertension; **IDF**: International Diabetes Federation; **IFG**: Impaired Fasting Glucose; **IGT**: Impaired Glucose Tolerance
**NCEP ATPIII**: National Cholesterol Education Program Adult Treatment Panel III; **T2D**: Type 2 Diabetes; **TG**: Triglycerides; **WC**: Waist
Circumference; **WHO**: World Health Organization
